# Supplementary material for: CO2 capture properties of lithium silicates with different ratios of Li2O/SiO2: an ab initio thermodynamic and experimental approach
Source: Royal Society of Chemistry journal article supplement (doi:10.1039/c3cp51659h), 2013-01-01
Supplement: c3cp51659h.pdf [file c3cp51659h.pdf]

# CO<sub>2</sub> capture properties of lithium silicates with different ratios of Li<sub>2</sub>O/SiO<sub>2</sub>: an *ab initio* thermodynamic and experimental approach

Yuhua Duan,<sup>\*a</sup> Heriberto Pfeiffer,<sup>b</sup> Bingyun Li,<sup>a,c</sup> Issis C. Romero-Ibarra,<sup>b</sup> Dan C. Sorescu,<sup>a</sup> David R. Luebke,<sup>a</sup> J. Woods Halley<sup>d</sup>

## Supplementary Information

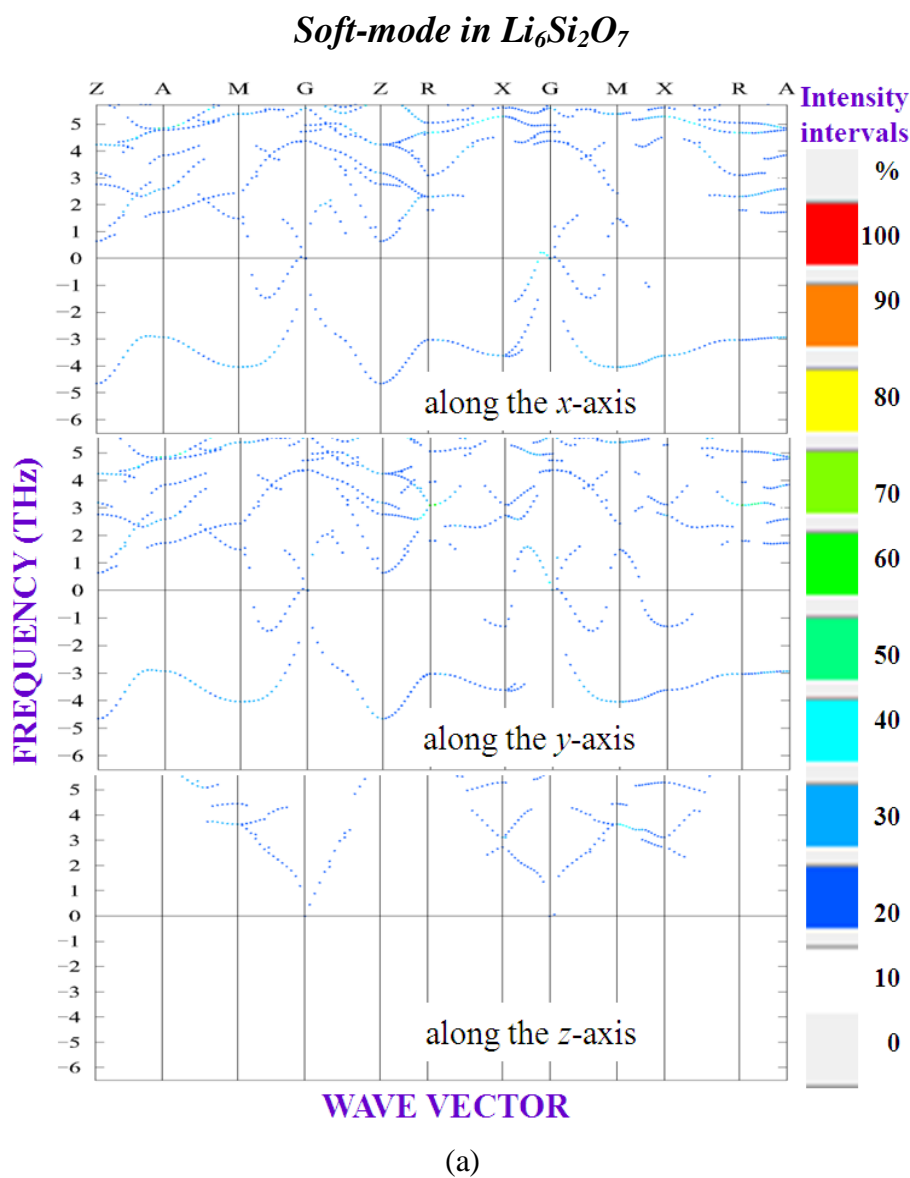

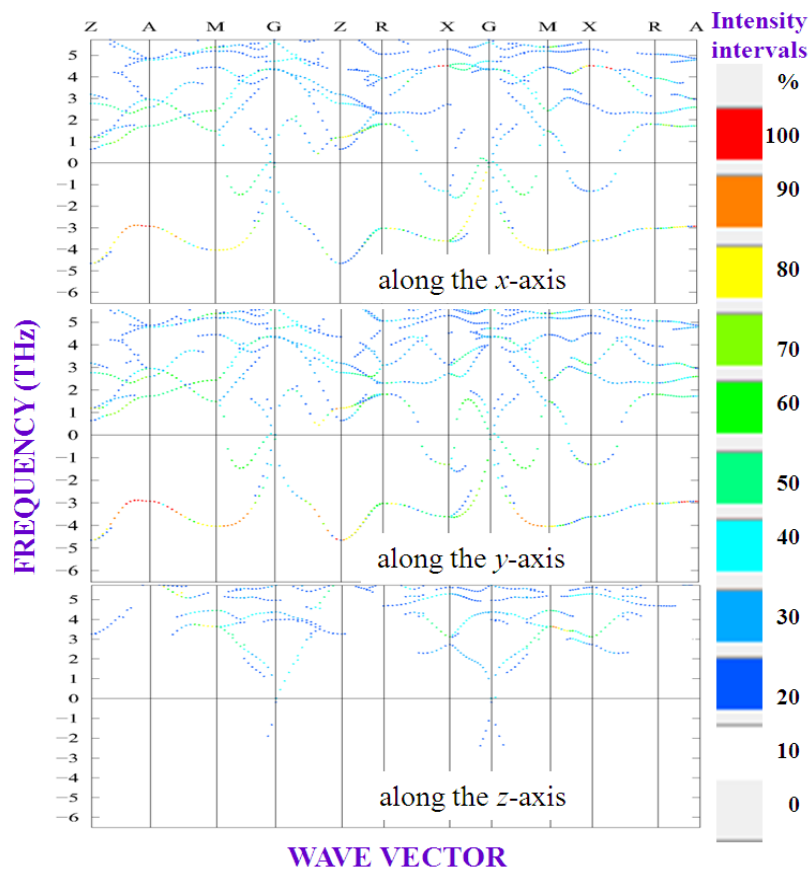

(b)

**Fig. S1.** The phonon dispersion along  $x$ -,  $y$ -, and  $z$ -axis (a) O atom in  $\text{Li}_6\text{Si}_2\text{O}_7$ ; (b) Si atom in  $\text{Li}_6\text{Si}_2\text{O}_7$ . Obviously, the soft modes are mainly due to motions of O and Si atom along  $x$ - and  $y$ - directions.
